# Supplementary material for: Theoretical study on the photooxygenation and photorearrangement reactions of 3-hydroxyflavone
Source: Royal Society of Chemistry journal article supplement (doi:10.1039/c7ra04590e), 2017-01-01
Supplement: c7ra04590e1.pdf [file c7ra04590e1.pdf]

## Electronic Supplementary Information

### THEORETICAL STUDY ON THE PHOTOOXYGENATION AND PHOTOREARRANGEMENT REACTIONS OF 3-HYDROXYFLAVONE

Zoltán Szakács,<sup>a</sup> Mihály Kállay,<sup>b</sup> and Miklós Kubinyi<sup>a,c</sup>

<sup>a</sup> *Department of Physical Chemistry and Materials Science, Budapest University of Technology and Economics, 1521 Budapest, Hungary. E-mail: kubinyi@mail.bme.hu*

<sup>b</sup> *MTA-BME Lendület Quantum Chemistry Research Group, Department of Physical Chemistry and Materials Science, Budapest University of Technology and Economics, 1521 Budapest, Hungary.*

<sup>c</sup> *Institute of Materials and Environmental Chemistry, Research Center for Natural Sciences, Hungarian Academy of Sciences, 1519 Budapest, P.O. Box 286, Hungary*

#### Contents

Table S1. The calculated excitation energies on the S<sub>1</sub> optimized structures of the normal (N\*) and phototautomeric (PT\*) forms of 3HF in *n*-hexane.

Table S2. Descartes coordinates of the stationary points in the photooxygenation reaction of 3HF with <sup>3</sup>O<sub>2</sub> in *n*-hexane.

Table S3. Descartes coordinates of the stationary points in the photosensitized oxygenation of 3HF in acetonitrile

Table S4. Descartes coordinates of the stationary points in the photorearrangement reaction of 3HF in *n*-hexane

Table S1 – The calculated excitation energies on the  $S_1$  optimized structures of the normal ( $N^*$ ) and phototautomeric ( $PT^*$ ) forms of 3HF in hexane.<sup>a</sup>

| State | Excitation energies (eV) |         |                          |         |
|-------|--------------------------|---------|--------------------------|---------|
|       | $N^*$ form multiplicity  |         | $PT^*$ form multiplicity |         |
|       | triplet                  | singlet | singlet                  | triplet |
| 1     | 1.60                     | 3.41    | 2.47                     | 1.76    |
| 2     | 2.00                     |         |                          | 2.39    |
| 3     | 2.08                     |         |                          | 2.66    |
| 4     | 2.54                     |         |                          | 3.06    |
| 5     | 2.66                     |         |                          | 3.12    |
| 6     | 2.89                     |         |                          | 3.34    |
| 7     | 2.95                     |         |                          | 3.47    |
| 8     | 3.04                     |         |                          | 3.61    |
| 9     | 3.07                     |         |                          | 3.68    |
| 10    | 3.49                     |         |                          | 4.02    |
| 11    | 3.68                     |         |                          | 4.03    |
| 12    | 3.68                     |         |                          | 4.19    |
| 13    | 3.89                     |         |                          | 4.38    |
| 14    | 4.04                     |         |                          | 4.44    |
| 15    | 4.13                     |         |                          | 4.55    |
| 16    | 4.14                     |         |                          | 4.63    |
| 17    | 4.23                     |         |                          | 4.67    |
| 18    | 4.32                     |         |                          | 4.68    |
| 19    | 4.45                     |         |                          | 4.79    |
| 20    | 4.46                     |         |                          | 4.88    |

<sup>a</sup> The excitation energies were calculated on the optimized  $S_1$  structures employing the M062X functional with the 6-311++G\*\* basis set.

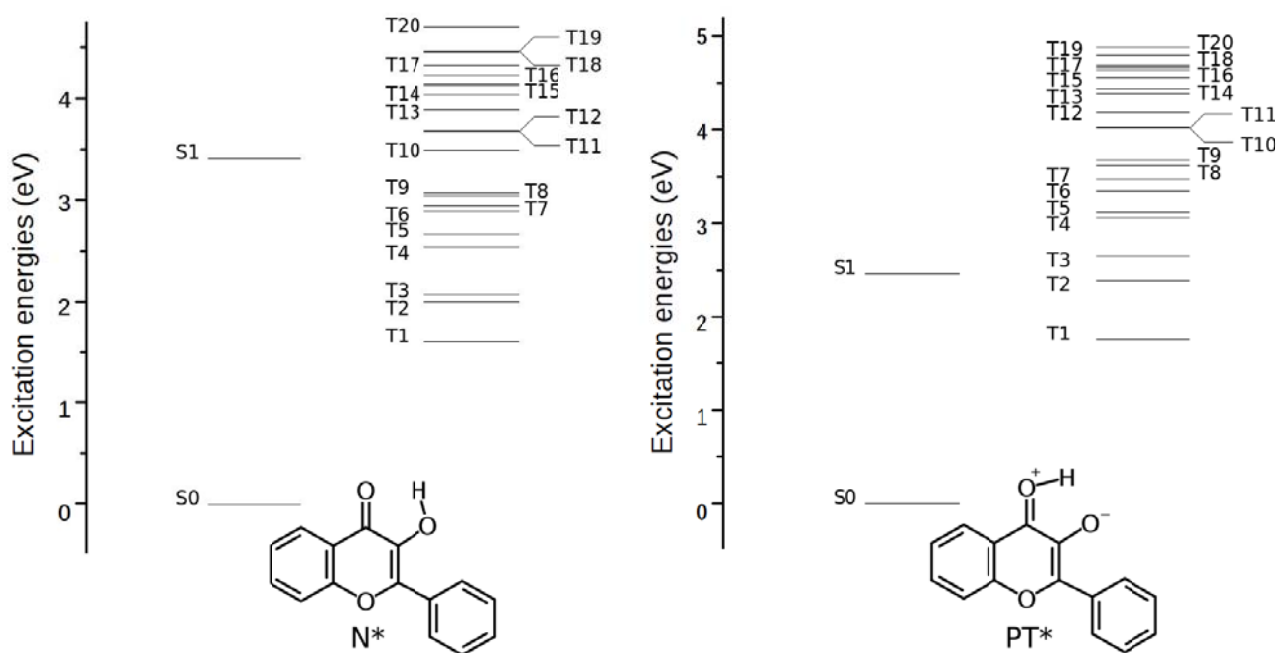

Table S2. Descartes coordinates of the stationary points in the photooxygenation reaction of 3HF with  $^3\text{O}_2$  in *n*-hexane (see Fig. 3 in the main text)

| $^1\text{N}$   |           |           | $^3\text{N}^*$ |           |           |           |           |
|----------------|-----------|-----------|----------------|-----------|-----------|-----------|-----------|
| C              | 0.000000  | 0.000000  | 0.000000       | 0.000000  | 0.000000  |           |           |
| C              | 0.000000  | 0.000000  | 1.401366       | 0.000000  | 1.425649  |           |           |
| C              | 1.223740  | 0.000000  | 2.082939       | 0.000000  | 2.091133  |           |           |
| C              | 2.416651  | -0.004765 | 1.370612       | 0.006757  | 1.363646  |           |           |
| C              | 2.409772  | -0.015043 | -0.020238      | 2.414629  | 0.016830  | -0.033670 |           |
| C              | 1.196638  | -0.012502 | -0.702590      | 1.186417  | 0.012200  | -0.702756 |           |
| C              | -1.283280 | 0.012587  | 2.119764       | -1.221364 | -0.005515 | 2.118965  |           |
| C              | -1.509589 | -0.354319 | 3.407300       | -1.446687 | 0.037624  | 3.575396  |           |
| C              | -2.846734 | -0.323208 | 3.992115       | -2.661446 | -0.406126 | 4.172740  |           |
| C              | -3.908736 | 0.131088  | 3.102721       | -3.695007 | -0.867001 | 3.234543  |           |
| C              | -3.581821 | 0.486440  | 1.795014       | -3.502895 | -0.652054 | 1.867374  |           |
| O              | -2.313523 | 0.424817  | 1.329209       | O         | -2.365625 | -0.042159 | 1.374009  |
| C              | -4.562144 | 0.929689  | 0.902038       | C         | -4.469022 | -1.009308 | 0.941560  |
| C              | -5.869265 | 1.009379  | 1.336463       | C         | -5.645800 | -1.602589 | 1.389961  |
| C              | -6.218003 | 0.653832  | 2.650653       | C         | -5.852424 | -1.833716 | 2.747894  |
| C              | -5.245169 | 0.219279  | 3.523802       | C         | -4.878732 | -1.462363 | 3.666174  |
| O              | -3.002959 | -0.677720 | 5.155841       | O         | -2.791703 | -0.327872 | 5.411855  |
| O              | -0.533189 | -0.791322 | 4.231100       | O         | -0.532939 | 0.547633  | 4.370953  |
| H              | -5.476336 | -0.062762 | 4.543947       | H         | -5.014744 | -1.614698 | 4.730302  |
| H              | -7.249366 | 0.723505  | 2.972071       | H         | -6.770824 | -2.295871 | 3.086922  |
| H              | -6.635695 | 1.352295  | 0.651883       | H         | -6.404382 | -1.884619 | 0.669979  |
| H              | -4.273220 | 1.200790  | -0.105429      | H         | -4.290525 | -0.818646 | -0.109087 |
| H              | -0.980844 | -1.007836 | 5.066755       | H         | -0.912339 | 0.488477  | 5.273344  |
| H              | 1.241596  | 0.009610  | 3.162835       | H         | 1.301168  | -0.010658 | 3.170393  |
| H              | 3.356882  | 0.000788  | 1.908748       | H         | 3.380781  | 0.001493  | 1.889509  |
| H              | 1.181488  | -0.020119 | -1.785842      | H         | 1.162716  | 0.015837  | -1.786186 |
| H              | -0.940638 | 0.004465  | -0.534471      | H         | -0.945576 | -0.005805 | -0.524669 |
| H              | 3.343525  | -0.022685 | -0.569748      | H         | 3.341879  | 0.023263  | -0.592742 |
| $^1\text{N}^*$ |           |           | $^1\text{PT}$  |           |           |           |           |
| C              | -3.671874 | 0.339735  | 0.027178       | C         | 0.000000  | 0.000000  | 0.000000  |
| C              | -2.268629 | 0.356271  | 0.006687       | C         | 0.000000  | 0.000000  | 1.405991  |
| C              | -1.589121 | -0.874487 | -0.007605      | C         | 1.227907  | 0.000000  | 2.088509  |
| C              | -2.262810 | -2.075990 | -0.001772      | C         | 2.418468  | -0.000021 | 1.371422  |
| C              | -3.666101 | -2.071094 | 0.019245       | C         | 2.410023  | -0.000021 | -0.018897 |
| C              | -4.362077 | -0.868512 | 0.033431       | C         | 1.194542  | 0.000000  | -0.701383 |
| O              | -0.208254 | -0.949250 | -0.029462      | C         | -1.259739 | -0.000022 | 2.138412  |
| C              | 0.597193  | 0.139160  | -0.017151      | C         | -1.403875 | 0.000592  | 3.541081  |
| C              | -0.053347 | 1.404037  | -0.022356      | C         | -2.760400 | 0.000466  | 4.012439  |
| C              | -1.502390 | 1.573100  | -0.004981      | C         | -3.876109 | -0.000134 | 3.155613  |
| C              | 1.987078  | -0.140046 | -0.003171      | C         | -3.601563 | -0.000728 | 1.779769  |
| C              | 2.421561  | -1.499736 | -0.039839      | O         | -2.343477 | -0.000713 | 1.331439  |
| C              | 3.764489  | -1.807693 | -0.029033      | C         | -4.634695 | -0.001376 | 0.831585  |
| C              | 4.728932  | -0.794491 | 0.020975       | C         | -5.935027 | -0.001379 | 1.275825  |
| C              | 4.321972  | 0.543346  | 0.061719       | C         | -6.234347 | -0.000765 | 2.658831  |
| C              | 2.984328  | 0.879474  | 0.051591       | C         | -5.226679 | -0.000173 | 3.586566  |
| O              | 0.612815  | 2.535341  | -0.047870      | O         | -2.881949 | 0.001074  | 5.317244  |
| O              | -1.934825 | 2.748841  | -0.011129      | O         | -0.499046 | 0.001235  | 4.428889  |
| H              | -4.190352 | 1.290499  | 0.037260       | H         | -5.432034 | 0.000304  | 4.649595  |
| H              | -5.444902 | -0.869760 | 0.049093       | H         | -7.268129 | -0.000799 | 2.980126  |
| H              | -4.199860 | -3.013059 | 0.023589       | H         | -6.743766 | -0.001843 | 0.555519  |
| H              | -1.697975 | -2.999556 | -0.013638      | H         | -4.382859 | -0.001823 | -0.221190 |
| H              | -0.099032 | 3.222360  | -0.041128      | H         | -1.941392 | 0.001415  | 5.628067  |
| H              | 2.695104  | 1.918614  | 0.088356       | H         | 1.228378  | 0.000049  | 3.169125  |
| H              | 5.064414  | 1.331226  | 0.104569       | H         | 3.359862  | -0.000037 | 1.907752  |
| H              | 4.073770  | -2.845660 | -0.059988      | H         | 1.179755  | 0.000016  | -1.784731 |
| H              | 1.682884  | -2.288055 | -0.080013      | H         | -0.938893 | 0.000016  | -0.537404 |
| H              | 5.782836  | -1.044501 | 0.030069       | H         | 3.342748  | -0.000021 | -0.570377 |

<sup>1</sup>PT\*

|   |           |           |           |
|---|-----------|-----------|-----------|
| C | 0.000081  | -0.000015 | -0.000061 |
| C | 0.000002  | -0.000002 | 1.413285  |
| C | 1.243700  | 0.000019  | 2.086292  |
| C | 2.435920  | 0.000028  | 1.390341  |
| C | 2.411187  | 0.000010  | -0.007866 |
| C | 1.197009  | -0.000011 | -0.695985 |
| O | 1.321781  | 0.000010  | 3.449887  |
| C | 0.223087  | 0.000080  | 4.261694  |
| C | -1.075596 | 0.000091  | 3.650308  |
| C | -1.156352 | 0.000010  | 2.207558  |
| C | 0.529807  | 0.000140  | 5.652798  |
| C | 1.889620  | 0.000303  | 6.066407  |
| C | 2.219199  | 0.000358  | 7.408659  |
| C | 1.221988  | 0.000247  | 8.384613  |
| C | -0.119884 | 0.000077  | 7.994636  |
| C | -0.473502 | 0.000021  | 6.658978  |
| O | -2.162100 | 0.000154  | 4.282548  |
| O | -2.367072 | 0.000011  | 1.659848  |
| H | -0.951536 | -0.000030 | -0.516235 |
| H | 1.190393  | -0.000023 | -1.778708 |
| H | 3.345888  | 0.000012  | -0.554549 |
| H | 3.366935  | 0.000042  | 1.942893  |
| H | -3.000269 | 0.000061  | 2.401088  |
| H | -1.513635 | -0.000121 | 6.370177  |
| H | -0.899829 | -0.000023 | 8.747027  |
| H | 3.262757  | 0.000488  | 7.701016  |
| H | 2.671153  | 0.000396  | 5.319225  |
| H | 1.485714  | 0.000288  | 9.435419  |

<sup>3</sup>PT\*

|   |           |           |           |
|---|-----------|-----------|-----------|
| C | 0.018096  | -0.000282 | -0.003160 |
| C | 0.026891  | -0.000029 | 1.411670  |
| C | 1.278701  | 0.000235  | 2.071441  |
| C | 2.453428  | 0.000255  | 1.338903  |
| C | 2.429500  | 0.000014  | -0.055590 |
| C | 1.203504  | -0.000254 | -0.718042 |
| C | -1.221117 | -0.000080 | 2.116643  |
| C | -1.424768 | 0.000465  | 3.559967  |
| C | -2.784813 | 0.000375  | 4.056333  |
| C | -3.891651 | -0.000151 | 3.168517  |
| C | -3.611801 | -0.000646 | 1.789495  |
| O | -2.322198 | -0.000656 | 1.306382  |
| C | -4.623740 | -0.001166 | 0.853256  |
| C | -5.953630 | -0.001205 | 1.282970  |
| C | -6.255219 | -0.000722 | 2.641895  |
| C | -5.233578 | -0.000197 | 3.581523  |
| O | -2.969753 | 0.000873  | 5.377096  |
| O | -0.500292 | 0.001010  | 4.389207  |
| H | -5.446936 | 0.000187  | 4.643072  |
| H | -7.287649 | -0.000755 | 2.967870  |
| H | -6.749336 | -0.001616 | 0.548706  |
| H | -4.365594 | -0.001539 | -0.198218 |
| H | -2.086941 | 0.001217  | 5.784303  |
| H | 1.314481  | 0.000421  | 3.149820  |
| H | 3.401935  | 0.000454  | 1.862795  |
| H | 1.172420  | -0.000440 | -1.801196 |
| H | -0.927245 | -0.000486 | -0.527369 |
| H | 3.355009  | 0.000032  | -0.618471 |

TS0

|   |           |           |           |
|---|-----------|-----------|-----------|
| C | 0.000000  | 0.000000  | 0.000000  |
| C | 0.000000  | 0.000000  | 1.422300  |
| C | 1.249500  | 0.000000  | 2.100500  |
| C | 2.430700  | -0.000100 | 1.386200  |
| C | 2.415800  | -0.000100 | -0.011400 |
| C | 1.193900  | -0.000100 | -0.692100 |
| C | -1.208000 | 0.000100  | 2.167900  |
| C | -2.529900 | -0.000200 | 1.679300  |
| C | -3.696100 | -0.000100 | 2.572400  |
| C | -3.476100 | -0.000300 | 3.965000  |
| C | -2.128900 | -0.000000 | 4.402800  |
| O | -1.061900 | 0.000600  | 3.523200  |
| C | -1.811800 | -0.000300 | 5.741800  |
| C | -2.843600 | -0.000800 | 6.694300  |
| C | -4.175300 | -0.001000 | 6.289000  |
| C | -4.496500 | -0.000800 | 4.939000  |
| O | -2.941400 | -0.000600 | 0.461000  |
| O | -4.777800 | -0.000400 | 1.891000  |
| H | -4.072300 | -0.000600 | 0.779800  |
| H | -5.525700 | -0.001100 | 4.602100  |
| H | -4.965500 | -0.001400 | 7.029600  |
| H | -2.592800 | -0.000900 | 7.747400  |
| H | -0.769800 | -0.000100 | 6.036000  |
| H | 1.263700  | 0.000000  | 3.181900  |
| H | 3.375900  | -0.000100 | 1.915800  |
| H | 3.346800  | -0.000200 | -0.565200 |
| H | 1.179800  | -0.000100 | -1.775400 |
| H | -0.939000 | 0.000100  | -0.535500 |

TS1

|   |           |           |           |
|---|-----------|-----------|-----------|
| C | -3.641928 | 0.401431  | -0.298625 |
| C | -2.224772 | 0.402160  | -0.309357 |
| C | -1.545595 | -0.822182 | -0.395030 |
| C | -2.240703 | -2.037334 | -0.473123 |
| C | -3.614628 | -2.009960 | -0.461071 |
| C | -4.319886 | -0.786521 | -0.373819 |
| O | -0.209072 | -0.866688 | -0.406056 |
| C | 0.578714  | 0.228627  | -0.329707 |
| C | 0.014379  | 1.517076  | -0.228951 |
| C | -1.422042 | 1.553483  | -0.222671 |
| C | 2.001099  | -0.088210 | -0.340465 |
| C | 2.964218  | 0.929622  | -0.244132 |
| C | 4.315638  | 0.605559  | -0.245566 |
| C | 4.728523  | -0.718716 | -0.341798 |
| C | 3.776960  | -1.732723 | -0.438138 |
| C | 2.426219  | -1.424866 | -0.437876 |
| O | 0.606561  | 2.633372  | -0.140280 |
| O | -1.933981 | 2.755876  | -0.126426 |
| O | -0.654955 | -0.571676 | 2.386680  |
| O | 0.505031  | -0.388460 | 2.571751  |
| H | -1.132809 | 3.336473  | -0.082451 |
| H | -4.160940 | 1.349080  | -0.229455 |
| H | -5.402392 | -0.795263 | -0.365894 |
| H | -4.166206 | -2.940120 | -0.519764 |
| H | -1.680812 | -2.961473 | -0.538773 |
| H | 2.637467  | 1.956739  | -0.167182 |
| H | 5.050579  | 1.398032  | -0.169948 |
| H | 5.784262  | -0.962622 | -0.341817 |
| H | 4.090747  | -2.766970 | -0.513827 |
| H | 1.694250  | -2.217956 | -0.514280 |

## NP

|   |           |           |           |
|---|-----------|-----------|-----------|
| C | 0.033271  | 0.134902  | 0.029928  |
| C | 0.027501  | -0.030558 | 1.412666  |
| C | 1.223649  | -0.192693 | 2.108677  |
| C | 2.428053  | -0.197368 | 1.415566  |
| C | 2.438574  | -0.037713 | 0.033140  |
| C | 1.242217  | 0.128529  | -0.656995 |
| C | -1.259270 | 0.043118  | 2.176073  |
| O | -2.345281 | -0.311050 | 1.338157  |
| C | -3.596528 | -0.227311 | 1.913759  |
| C | -3.810656 | 0.396962  | 3.145118  |
| C | -2.605450 | 0.947500  | 3.871759  |
| C | -1.607718 | 1.396058  | 2.816562  |
| C | -4.658434 | -0.770395 | 1.204424  |
| C | -5.941238 | -0.678832 | 1.729752  |
| C | -6.167194 | -0.053546 | 2.953777  |
| C | -5.098848 | 0.485359  | 3.659199  |
| O | -1.827531 | -0.129556 | 4.443351  |
| O | -1.231288 | -0.812935 | 3.304627  |
| O | -1.179615 | 2.485515  | 2.606135  |
| O | -2.925597 | 1.837609  | 4.847542  |
| H | -5.249318 | 0.986195  | 4.607565  |
| H | -7.170627 | 0.016170  | 3.353625  |
| H | -6.771379 | -1.100025 | 1.175696  |
| H | -4.463838 | -1.251599 | 0.254410  |
| H | 1.205981  | -0.327433 | 3.183349  |
| H | -0.901355 | 0.261543  | -0.500621 |
| H | 1.248106  | 0.253459  | -1.732974 |
| H | 3.357793  | -0.329995 | 1.955240  |
| H | -2.170115 | 2.412805  | 5.022888  |
| H | 3.378613  | -0.043549 | -0.505577 |

## TS2a

|   |           |           |           |
|---|-----------|-----------|-----------|
| C | 2.362700  | 1.394900  | 0.400800  |
| C | 2.074900  | 0.206100  | -0.260700 |
| C | 3.082300  | -0.703800 | -0.567600 |
| C | 4.393200  | -0.416000 | -0.208200 |
| C | 4.694100  | 0.774000  | 0.448800  |
| C | 3.680400  | 1.676500  | 0.749700  |
| C | 0.634000  | -0.138700 | -0.610800 |
| C | 0.062500  | -1.002000 | 0.656500  |
| C | -1.401000 | -1.505200 | -0.012800 |
| C | -2.181500 | -0.202600 | 0.058600  |
| C | -1.517200 | 0.969600  | -0.321100 |
| O | -0.172200 | 1.037200  | -0.625000 |
| C | -2.207900 | 2.174800  | -0.363800 |
| C | -3.553600 | 2.209300  | -0.021500 |
| C | -4.217300 | 1.050100  | 0.372200  |
| C | -3.525200 | -0.153800 | 0.411100  |
| O | 0.490500  | -0.934000 | -1.612000 |
| O | 0.479400  | -1.290500 | 1.694200  |
| O | -1.827200 | -2.551300 | 0.786000  |
| O | -1.074100 | -1.864700 | -1.217500 |
| H | -1.627600 | -2.359200 | 1.712100  |
| H | -4.019000 | -1.073500 | 0.702600  |
| H | -5.265400 | 1.083700  | 0.640700  |
| H | -4.085300 | 3.152400  | -0.059100 |
| H | -1.674600 | 3.068800  | -0.662100 |
| H | 2.837900  | -1.620600 | -1.089500 |
| H | 5.180900  | -1.119500 | -0.448700 |
| H | 5.718000  | 0.997400  | 0.723400  |
| H | 3.911200  | 2.604600  | 1.258500  |
| H | 1.569100  | 2.093800  | 0.629000  |

## TS2b

|   |           |           |           |
|---|-----------|-----------|-----------|
| O | 0.803787  | -1.564878 | 1.440490  |
| C | 1.418812  | -1.436757 | -0.159308 |
| C | 0.051450  | -1.063829 | -0.745218 |
| C | -0.601378 | -0.191278 | 0.342752  |
| O | -0.553511 | -1.090207 | 1.454071  |
| C | 2.229042  | -0.198002 | -0.151246 |
| C | 1.530349  | 0.962576  | 0.207384  |
| O | 0.204057  | 0.943382  | 0.590102  |
| C | 3.575152  | -0.140755 | -0.486690 |
| C | 4.231595  | 1.083254  | -0.467081 |
| C | 3.533681  | 2.233072  | -0.103070 |
| C | 2.185008  | 2.183323  | 0.237488  |
| C | -2.031986 | 0.193888  | 0.128284  |
| C | -2.979701 | -0.818375 | -0.027460 |
| C | -4.309916 | -0.488664 | -0.248590 |
| C | -4.694478 | 0.847694  | -0.317233 |
| C | -3.746795 | 1.853683  | -0.165323 |
| C | -2.412314 | 1.530581  | 0.057398  |
| O | 1.846338  | -2.652685 | -0.151808 |
| O | -0.404672 | -1.411063 | -1.787246 |
| H | -2.677502 | -1.857487 | 0.026742  |
| H | -5.045494 | -1.274314 | -0.369156 |
| H | -5.732868 | 1.103390  | -0.491224 |
| H | -4.044516 | 2.893726  | -0.219199 |
| H | -1.669630 | 2.307610  | 0.177164  |
| H | 1.640040  | 3.070619  | 0.533351  |
| H | 4.045604  | 3.187559  | -0.080879 |
| H | 5.279578  | 1.142994  | -0.730322 |
| H | 4.082592  | -1.058686 | -0.758678 |
| H | 1.083072  | -2.614273 | 0.934817  |

## XP

|   |           |           |           |
|---|-----------|-----------|-----------|
| C | 0.457815  | 0.391119  | -0.004424 |
| C | 0.194940  | 0.121478  | 1.461061  |
| C | 1.267687  | -0.145805 | 2.311709  |
| C | 1.031529  | -0.429165 | 3.650872  |
| C | -0.270498 | -0.453597 | 4.142574  |
| C | -1.337839 | -0.191610 | 3.291296  |
| C | -1.108640 | 0.096965  | 1.949742  |
| H | 2.277881  | -0.131729 | 1.924992  |
| H | 1.866161  | -0.632506 | 4.310694  |
| H | -0.451544 | -0.676180 | 5.187425  |
| H | -2.352810 | -0.208548 | 3.669466  |
| H | -1.936916 | 0.308973  | 1.286912  |
| O | -0.676260 | 1.024272  | -0.547657 |
| C | -0.973108 | 0.959679  | -1.877925 |
| C | -1.773088 | 1.983379  | -2.378965 |
| H | -2.061294 | 2.790336  | -1.717728 |
| C | -2.175277 | 1.944140  | -3.703973 |
| H | -2.794243 | 2.744575  | -4.091785 |
| C | -1.791634 | 0.893071  | -4.544118 |
| H | -2.110922 | 0.877591  | -5.578062 |
| C | -1.000444 | -0.120536 | -4.040588 |
| H | -0.681043 | -0.951615 | -4.658288 |
| C | -0.585247 | -0.098918 | -2.702899 |
| C | 0.261080  | -1.169622 | -2.167435 |
| O | 0.549763  | -2.184528 | -2.746082 |
| C | 0.856135  | -0.910295 | -0.763461 |
| O | 1.665056  | -1.652840 | -0.296601 |
| H | 2.907443  | 1.117823  | -1.352819 |
| O | 1.562585  | 1.258812  | -0.050775 |
| O | 1.968979  | 1.343135  | -1.419083 |

SA

|   |           |           |           |
|---|-----------|-----------|-----------|
| C | 0.000100  | 0.000900  | -0.001700 |
| C | -0.001100 | 0.001600  | 1.396900  |
| C | 1.188900  | 0.000800  | 2.108800  |
| C | 2.401600  | 0.001700  | 1.431700  |
| C | 2.424300  | -0.011000 | 0.040600  |
| C | 1.230000  | -0.016800 | -0.663400 |
| O | -1.165900 | 0.044800  | 2.140800  |
| C | -1.999700 | -1.030800 | 2.082600  |
| O | -1.710400 | -2.048500 | 1.520600  |
| C | -1.215100 | 0.017100  | -0.867900 |
| O | -2.347200 | 0.346800  | -0.225500 |
| C | -3.272200 | -0.780600 | 2.806600  |
| C | -4.157400 | -1.849500 | 2.948900  |
| C | -5.364900 | -1.662200 | 3.607600  |
| C | -5.689500 | -0.407800 | 4.118900  |
| C | -4.807400 | 0.659400  | 3.972600  |
| C | -3.595600 | 0.476500  | 3.317200  |
| O | -1.191800 | -0.212400 | -2.048200 |
| H | 1.220700  | -0.030800 | -1.746100 |
| H | 3.366800  | -0.017700 | -0.491900 |
| H | 3.327800  | 0.004700  | 1.993500  |
| H | 1.142700  | -0.003200 | 3.190500  |
| H | -3.884300 | -2.814600 | 2.539800  |
| H | -2.903800 | 1.299400  | 3.194200  |
| H | -5.064500 | 1.634300  | 4.368600  |
| H | -6.053100 | -2.490800 | 3.722200  |
| H | -3.065900 | 0.313100  | -0.872500 |
| H | -6.632900 | -0.261400 | 4.631800  |

Table S3. Descartes coordinates of the stationary points in the photosensitized oxygenation of 3HF in acetonitrile (see Fig. 5.in the main article)

| <sup>1</sup> N |           |           | NP        |   |           |           |           |
|----------------|-----------|-----------|-----------|---|-----------|-----------|-----------|
| C              | -0.000981 | -0.005020 | 0.000597  |   |           |           |           |
| C              | -0.001034 | -0.005367 | 1.405807  | O | -0.042471 | 0.011170  | -0.008678 |
| C              | 1.217611  | 0.018637  | 2.084043  | C | -0.012487 | -0.001080 | 1.409931  |
| C              | 2.431621  | 0.043788  | 1.391022  | C | 1.498603  | 0.002649  | 1.692661  |
| C              | 2.407696  | 0.044036  | 0.011413  | C | 1.985609  | -0.926515 | 0.591151  |
| C              | 1.189884  | 0.019622  | -0.691292 | O | 1.272563  | -0.342207 | -0.524680 |
| O              | 1.285682  | 0.023720  | 3.435482  | C | 1.427525  | -2.296771 | 0.904150  |
| C              | 0.164142  | 0.001495  | 4.202142  | C | 0.175404  | -2.361583 | 1.521296  |
| C              | -1.066019 | -0.029273 | 3.627249  | O | -0.526460 | -1.229234 | 1.886212  |
| C              | -1.234246 | -0.035537 | 2.180380  | C | 2.102990  | -3.470935 | 0.589962  |
| C              | 0.470098  | -0.019352 | 5.640839  | C | 1.528995  | -4.702223 | 0.881899  |
| C              | 1.716725  | -0.496249 | 6.067681  | C | 0.277551  | -4.754200 | 1.492341  |
| C              | 2.029475  | -0.526734 | 7.420108  | C | -0.405437 | -3.587327 | 1.814258  |
| C              | 1.109753  | -0.072952 | 8.362314  | C | -0.805260 | 1.144563  | 1.961748  |
| C              | -0.125357 | 0.412734  | 7.943097  | C | -1.596326 | 0.980487  | 3.096214  |
| C              | -0.449971 | 0.439535  | 6.591815  | C | -2.279847 | 2.074045  | 3.619699  |
| O              | -2.207807 | -0.083327 | 4.349539  | C | -2.168846 | 3.323343  | 3.017583  |
| O              | -2.367695 | -0.077113 | 1.703764  | C | -1.370559 | 3.483909  | 1.887468  |
| H              | -0.954828 | -0.024542 | -0.512472 | C | -0.687115 | 2.396205  | 1.357829  |
| H              | 1.192890  | 0.020444  | -1.773782 | O | 3.314291  | -0.945915 | 0.311663  |
| H              | 3.342517  | 0.063680  | -0.535454 | O | 2.121494  | 0.589268  | 2.518838  |
| H              | 3.358696  | 0.063066  | 1.949766  | H | 3.078672  | -3.406941 | 0.124383  |
| H              | -2.927554 | -0.125162 | 3.697702  | H | 2.055480  | -5.616047 | 0.638431  |
| H              | -1.409048 | 0.824206  | 6.275567  | H | -0.172935 | -5.711775 | 1.723341  |
| H              | -0.841197 | 0.776485  | 8.670330  | H | -1.376638 | -3.610347 | 2.292237  |
| H              | 2.993280  | -0.905129 | 7.738668  | H | -0.070946 | 2.513831  | 0.474133  |
| H              | 2.434804  | -0.847365 | 5.337880  | H | -1.679046 | 0.007097  | 3.561401  |
| H              | 1.356135  | -0.095078 | 9.417151  | H | -2.899386 | 1.947139  | 4.499106  |
|                |           |           |           | H | -1.282485 | 4.455202  | 1.416389  |
|                |           |           |           | H | 3.674058  | -0.049511 | 0.345174  |
|                |           |           |           | H | -2.703153 | 4.171913  | 3.427773  |
| TS1            |           |           | TS2a      |   |           |           |           |
| C              | 0.000000  | 0.000000  | 0.000000  | C | -0.004578 | 0.018944  | 0.006377  |
| C              | 0.000000  | 0.000000  | 1.404363  | C | -0.003629 | -0.012856 | 1.396232  |
| C              | 1.219805  | 0.000000  | 2.080763  | C | 1.209932  | -0.009470 | 2.093607  |
| C              | 2.432878  | 0.007814  | 1.388208  | C | 2.412060  | 0.001524  | 1.397229  |
| C              | 2.408260  | 0.010647  | 0.009084  | C | 2.399655  | 0.016445  | 0.007498  |
| C              | 1.190534  | 0.005548  | -0.692417 | C | 1.196114  | 0.030957  | -0.693476 |
| O              | 1.293781  | -0.010785 | 3.440041  | O | 1.311061  | 0.016463  | 3.472708  |
| C              | 0.165567  | 0.005123  | 4.189731  | C | 0.144199  | 0.081595  | 4.283381  |
| C              | -1.065421 | -0.009207 | 3.625036  | C | -0.918218 | 0.981930  | 3.437496  |
| C              | -1.242382 | -0.010012 | 2.171027  | C | -1.276379 | -0.113708 | 2.220096  |
| C              | 0.423708  | 0.014871  | 5.647220  | C | 0.419752  | 0.846916  | 5.570815  |
| C              | 0.539332  | 1.229872  | 6.321130  | C | 1.515678  | 1.700091  | 5.644721  |
| C              | 0.791421  | 1.241527  | 7.688256  | C | 1.734678  | 2.423598  | 6.814534  |
| C              | 0.927109  | 0.042142  | 8.380775  | C | 0.861669  | 2.300998  | 7.890011  |
| C              | 0.808574  | -1.170182 | 7.707983  | C | -0.237168 | 1.449533  | 7.800812  |
| C              | 0.555984  | -1.187449 | 6.340764  | C | -0.461686 | 0.717395  | 6.640973  |
| O              | -2.182042 | -0.017146 | 4.371310  | O | -0.478011 | -1.040594 | 4.446203  |
| O              | -2.370439 | -0.017842 | 1.698841  | O | -1.393923 | 2.022508  | 3.595501  |
| O              | -0.166751 | -2.564877 | 3.359334  | O | -2.455396 | 0.323010  | 1.648215  |
| O              | 0.978971  | -2.728043 | 3.052101  | O | -1.404150 | -1.244778 | 2.860046  |
| H              | -2.923271 | -0.037261 | 3.743961  | H | -2.420298 | 1.279354  | 1.505127  |
| H              | -0.957020 | -0.004021 | -0.507683 | H | -0.953987 | 0.025357  | -0.516096 |
| H              | 1.192574  | 0.005364  | -1.774946 | H | 1.193298  | 0.049748  | -1.775733 |
| H              | 3.343142  | 0.015462  | -0.538212 | H | 3.340335  | 0.025025  | -0.529504 |
| H              | 3.358394  | 0.006415  | 1.949616  | H | 3.340023  | 0.006453  | 1.955485  |
| H              | 0.453799  | -2.126119 | 5.809033  | H | -1.309487 | 0.047746  | 6.566751  |
| H              | 0.909795  | -2.103827 | 8.247937  | H | -0.918381 | 1.349726  | 8.636965  |
| H              | 1.121790  | 0.052374  | 9.446634  | H | 1.036060  | 2.867044  | 8.797050  |
| H              | 0.879671  | 2.185679  | 8.211952  | H | 2.590195  | 3.084841  | 6.879648  |
| H              | 0.427497  | 2.159092  | 5.774265  | H | 2.190802  | 1.793016  | 4.804544  |

## TS2b

|   |           |           |           |
|---|-----------|-----------|-----------|
| C | -0.002275 | 0.044675  | 0.002694  |
| C | 0.000293  | -0.001880 | 1.394252  |
| C | 1.204902  | -0.047093 | 2.098812  |
| C | 2.407955  | -0.053234 | 1.404650  |
| C | 2.409750  | -0.010909 | 0.012253  |
| C | 1.207245  | 0.039340  | -0.685405 |
| C | -1.282581 | 0.034116  | 2.164874  |
| C | -1.489625 | 1.229590  | 3.112327  |
| C | -2.766540 | 0.876939  | 3.882812  |
| O | -2.397661 | -0.779727 | 3.947773  |
| O | -1.251398 | -1.036834 | 3.117034  |
| O | -2.399067 | -0.101930 | 1.314708  |
| C | -3.603282 | 0.500235  | 1.632605  |
| C | -3.883961 | 0.985681  | 2.917046  |
| C | -4.565865 | 0.563371  | 0.638952  |
| C | -5.804677 | 1.124326  | 0.938560  |
| C | -6.088202 | 1.616185  | 2.211581  |
| C | -5.122420 | 1.543673  | 3.207784  |
| O | -2.826970 | 0.978831  | 5.171284  |
| O | -0.802889 | 2.190986  | 3.255848  |
| H | 1.201174  | -0.080986 | 3.182028  |
| H | 3.342863  | -0.090153 | 1.950043  |
| H | 3.349166  | -0.015142 | -0.527463 |
| H | 1.207359  | 0.073854  | -1.767958 |
| H | -0.940459 | 0.084920  | -0.534364 |
| H | -4.342541 | 0.171938  | -0.345354 |
| H | -6.558463 | 1.175841  | 0.162384  |
| H | -7.056030 | 2.051307  | 2.423703  |
| H | -5.308574 | 1.914916  | 4.208481  |
| H | -2.279196 | -0.230109 | 5.000968  |

## XP

|   |           |           |           |
|---|-----------|-----------|-----------|
| C | 0.027754  | 0.054916  | -0.020819 |
| C | 0.003365  | 0.020064  | 1.535259  |
| O | 1.292096  | 0.008909  | 2.102035  |
| C | 2.350515  | -0.592999 | 1.483944  |
| C | 2.429485  | -0.791201 | 0.102036  |
| C | 1.309542  | -0.403362 | -0.754431 |
| C | 3.584674  | -1.364285 | -0.448601 |
| C | 4.641745  | -1.725934 | 0.362578  |
| C | 4.549590  | -1.514002 | 1.743215  |
| C | 3.414902  | -0.952273 | 2.306513  |
| C | -0.757708 | 1.194234  | 2.110378  |
| C | -2.152420 | 1.197240  | 2.067040  |
| C | -2.855347 | 2.289476  | 2.562135  |
| C | -2.171227 | 3.380452  | 3.092275  |
| C | -0.780555 | 3.377163  | 3.127302  |
| C | -0.070342 | 2.285234  | 2.637324  |
| O | -0.703262 | -1.132016 | 1.922170  |
| O | -0.146033 | -2.231090 | 1.197550  |
| O | 1.304258  | -0.438014 | -1.959979 |
| O | -0.945741 | 0.370490  | -0.636264 |
| H | -2.682208 | 0.349945  | 1.651478  |
| H | -3.938176 | 2.287728  | 2.533094  |
| H | -2.721648 | 4.230782  | 3.476927  |
| H | -0.244181 | 4.223776  | 3.538310  |
| H | 1.011272  | 2.279611  | 2.667633  |
| H | 3.332936  | -0.784030 | 3.372645  |
| H | 5.374573  | -1.794626 | 2.387049  |
| H | 5.532766  | -2.169222 | -0.062319 |
| H | 3.620507  | -1.513347 | -1.521203 |
| H | -0.939614 | -2.630955 | 0.811629  |

## SA

|   |           |           |           |
|---|-----------|-----------|-----------|
| C | 0.002766  | -0.052650 | -0.002533 |
| C | 0.001973  | 0.016508  | 1.391719  |
| C | 1.205748  | 0.060054  | 2.097090  |
| C | 2.410888  | 0.030249  | 1.408265  |
| C | 2.413441  | -0.038365 | 0.016370  |
| C | 1.212093  | -0.078574 | -0.687173 |
| C | -1.259037 | 0.062010  | 2.172354  |
| O | -1.334196 | 0.220481  | 3.361069  |
| O | -2.350996 | -0.110712 | 1.383464  |
| C | -3.603749 | 0.012081  | 1.959406  |
| C | -4.065994 | 1.213733  | 2.505949  |
| C | -5.353872 | 1.245020  | 3.045756  |
| C | -6.169127 | 0.122890  | 3.020296  |
| C | -5.693777 | -1.059986 | 2.462168  |
| C | -4.407205 | -1.117599 | 1.939343  |
| C | -3.283580 | 2.482140  | 2.566608  |
| O | -3.537844 | 3.382308  | 3.326598  |
| O | -2.288286 | 2.553557  | 1.674487  |
| H | -5.704391 | 2.174206  | 3.477474  |
| H | -7.168517 | 0.170587  | 3.433367  |
| H | -6.320044 | -1.943323 | 2.437985  |
| H | -4.009105 | -2.029969 | 1.513401  |
| H | 1.183391  | 0.115608  | 3.178570  |
| H | -0.934788 | -0.081889 | -0.542147 |
| H | 1.217625  | -0.129557 | -1.769006 |
| H | 3.346323  | 0.061345  | 1.953157  |
| H | -1.839842 | 3.404596  | 1.790153  |
| H | 3.354129  | -0.059764 | -0.521083 |



Table S4. Descartes coordinates of the stationary points in the photorearrangement reaction of 3HF in *n*-hexane (see Fig. 7 in the main article)

|                 |           |           |                 |   |           |
|-----------------|-----------|-----------|-----------------|---|-----------|
| <sup>1</sup> N  |           |           | <sup>3</sup> N* |   |           |
| C               | 0.000000  | 0.000000  | 0.000000        | C | 0.000000  |
| C               | 0.000000  | 0.000000  | 1.401366        | C | 0.000000  |
| C               | 1.223740  | 0.000000  | 2.082939        | C | 1.260017  |
| C               | 2.416651  | -0.004765 | 1.370612        | C | 2.433352  |
| C               | 2.409772  | -0.015043 | -0.020238       | C | 2.414629  |
| C               | 1.196638  | -0.012502 | -0.702590       | C | 1.186417  |
| C               | -1.283280 | 0.012587  | 2.119764        | C | -1.221364 |
| C               | -1.509589 | -0.354319 | 3.407300        | C | -1.446687 |
| C               | -2.846734 | -0.323208 | 3.992115        | C | -2.661446 |
| C               | -3.908736 | 0.131088  | 3.102721        | C | -3.695007 |
| C               | -3.581821 | 0.486440  | 1.795014        | C | -3.502895 |
| O               | -2.313523 | 0.424817  | 1.329209        | O | -2.365625 |
| C               | -4.562144 | 0.929689  | 0.902038        | C | -4.469022 |
| C               | -5.869265 | 1.009379  | 1.336463        | C | -5.645800 |
| C               | -6.218003 | 0.653832  | 2.650653        | C | -5.852424 |
| C               | -5.245169 | 0.219279  | 3.523802        | C | -4.878732 |
| O               | -3.002959 | -0.677720 | 5.155841        | O | -2.791703 |
| O               | -0.533189 | -0.791322 | 4.231100        | O | -0.532939 |
| H               | -5.476336 | -0.062762 | 4.543947        | H | -5.014744 |
| H               | -7.249366 | 0.723505  | 2.972071        | H | -6.770824 |
| H               | -6.635695 | 1.352295  | 0.651883        | H | -6.404382 |
| H               | -4.273220 | 1.200790  | -0.105429       | H | -4.290525 |
| H               | -0.980844 | -1.007836 | 5.066755        | H | -0.912339 |
| H               | 1.241596  | 0.009610  | 3.162835        | H | 1.301168  |
| H               | 3.356882  | 0.000788  | 1.908748        | H | 3.380781  |
| H               | 1.181488  | -0.020119 | -1.785842       | H | 1.162716  |
| H               | -0.940638 | 0.004465  | -0.534471       | H | -0.945576 |
| H               | 3.343525  | -0.022685 | -0.569748       | H | 3.341879  |
|                 |           |           |                 |   |           |
| <sup>1</sup> N* |           |           | TS1             |   |           |
| C               | -3.671874 | 0.339735  | 0.027178        | C | -0.084663 |
| C               | -2.268629 | 0.356271  | 0.006687        | C | -0.029839 |
| C               | -1.589121 | -0.874487 | -0.007605       | C | 1.234694  |
| C               | -2.262810 | -2.075990 | -0.001722       | C | 2.394766  |
| C               | -3.666101 | -2.071094 | 0.019245        | C | 2.320536  |
| C               | -4.362077 | -0.868512 | 0.033431        | C | 1.071644  |
| O               | -0.208254 | -0.949250 | -0.029462       | C | -1.282240 |
| C               | 0.597193  | 0.139160  | -0.017151       | C | -1.387215 |
| C               | -0.053347 | 1.404037  | -0.022356       | C | -2.725250 |
| C               | -1.502390 | 1.573100  | -0.004981       | C | -3.514623 |
| C               | 1.987078  | -0.140046 | -0.003171       | C | -2.730406 |
| C               | 2.421561  | -1.499736 | -0.039839       | O | -2.099538 |
| C               | 3.764489  | -1.807693 | -0.029033       | C | -3.282986 |
| C               | 4.728932  | -0.794491 | 0.020975        | C | -4.472381 |
| C               | 4.321972  | 0.543346  | 0.061719        | C | -5.199725 |
| C               | 2.984328  | 0.879474  | 0.051591        | C | -4.700926 |
| O               | 0.612815  | 2.535341  | -0.047870       | O | -0.474863 |
| O               | -1.934825 | 2.748841  | -0.011129       | O | -3.113487 |
| H               | -4.190352 | 1.290499  | 0.037260        | H | 1.360254  |
| H               | -5.444902 | -0.869760 | 0.049093        | H | 3.356783  |
| H               | -4.199860 | -3.013059 | 0.023589        | H | 3.223303  |
| H               | -1.697975 | -2.999556 | -0.013638       | H | 0.991961  |
| H               | -0.099032 | 3.222360  | -0.041128       | H | -1.036474 |
| H               | 2.695104  | 1.918614  | 0.088356        | H | -5.216857 |
| H               | 5.064414  | 1.331226  | 0.104569        | H | -6.139357 |
| H               | 4.073770  | -2.845660 | -0.059988       | H | -4.892470 |
| H               | 1.682884  | -2.288055 | -0.080013       | H | -2.816876 |
| H               | 5.782836  | -1.044501 | 0.030069        | H | 0.179606  |

## IM1

|   |           |           |           |
|---|-----------|-----------|-----------|
| C | -0.262160 | -0.441536 | 0.491628  |
| C | -0.010882 | -0.367601 | 1.863020  |
| C | 1.131305  | 0.281224  | 2.324515  |
| C | 2.017067  | 0.856680  | 1.416061  |
| C | 1.765426  | 0.784541  | 0.051068  |
| C | 0.623249  | 0.133888  | -0.410513 |
| C | -1.000843 | -0.987762 | 2.841334  |
| C | -2.328890 | -0.210587 | 2.961891  |
| C | -3.414519 | -1.045316 | 2.710858  |
| C | -2.950206 | -2.422550 | 2.364465  |
| C | -1.513197 | -2.349356 | 2.415067  |
| C | -4.708404 | -0.550131 | 2.762325  |
| C | -4.885717 | 0.793168  | 3.089443  |
| C | -3.791105 | 1.619132  | 3.350989  |
| C | -2.488432 | 1.122606  | 3.292497  |
| O | -0.539068 | -0.995934 | 4.139484  |
| O | -0.728482 | -3.372994 | 2.127605  |
| O | -3.641889 | -3.389022 | 2.079224  |
| H | -5.548457 | -1.201322 | 2.551053  |
| H | -5.886260 | 1.205472  | 3.140965  |
| H | -3.955318 | 2.659900  | 3.602526  |
| H | -1.632174 | 1.756888  | 3.490456  |
| H | -1.154427 | -0.944272 | 0.130551  |
| H | 1.322106  | 0.335298  | 3.389155  |
| H | 2.905654  | 1.359464  | 1.778780  |
| H | 0.421973  | 0.075458  | -1.473346 |
| H | 2.456477  | 1.231650  | -0.653394 |
| H | 0.202566  | -3.114135 | 2.157439  |

## TS2

|   |           |           |           |
|---|-----------|-----------|-----------|
| C | -0.002955 | -0.000296 | -0.022716 |
| C | -0.064358 | -0.011155 | 1.466966  |
| C | 1.320357  | -0.022718 | 1.903190  |
| C | 2.296922  | 0.023275  | 0.743115  |
| C | 1.320530  | 0.014768  | -0.453910 |
| C | -1.046010 | -0.027170 | -0.937454 |
| C | -0.729732 | -0.020418 | -2.293302 |
| C | 0.601006  | 0.005995  | -2.717930 |
| C | 1.648781  | 0.024785  | -1.798335 |
| C | 3.290399  | -1.128261 | 0.697249  |
| C | 4.601630  | -0.914271 | 0.283166  |
| C | 5.489971  | -1.984607 | 0.211176  |
| C | 5.072174  | -3.265773 | 0.552439  |
| C | 3.760187  | -3.478247 | 0.968687  |
| C | 2.871504  | -2.413104 | 1.041224  |
| O | 2.898927  | 1.260534  | 0.647282  |
| O | 1.716420  | -0.095566 | 3.177601  |
| O | -1.057549 | -0.009089 | 2.172635  |
| H | 4.924277  | 0.086539  | 0.024170  |
| H | 6.511085  | -1.813411 | -0.108476 |
| H | 5.765542  | -4.096521 | 0.498549  |
| H | 3.429495  | -4.473829 | 1.239127  |
| H | 1.849751  | -2.583294 | 1.366656  |
| H | -2.072593 | -0.053098 | -0.591165 |
| H | -1.522817 | -0.037715 | -3.031031 |
| H | 0.821882  | 0.010024  | -3.778536 |
| H | 2.683343  | 0.037139  | -2.120937 |
| H | 1.871811  | 0.773858  | 3.568691  |

<sup>3</sup>IN\*

|   |           |           |           |
|---|-----------|-----------|-----------|
| C | -0.076879 | 0.142945  | 0.015415  |
| C | -0.059079 | -0.006390 | 1.404149  |
| C | 1.158386  | -0.154861 | 2.064326  |
| C | 2.348489  | -0.164300 | 1.339847  |
| C | 2.326753  | -0.024891 | -0.041550 |
| C | 1.109539  | 0.132042  | -0.702607 |
| C | -1.353863 | 0.053747  | 2.197534  |
| C | -2.451727 | -0.869047 | 1.474855  |
| C | -3.581255 | 0.039432  | 1.038880  |
| C | -3.225735 | 1.395818  | 1.495941  |
| C | -2.003665 | 1.410059  | 2.155937  |
| C | -1.495445 | 2.585171  | 2.677980  |
| C | -2.243546 | 3.754175  | 2.528997  |
| C | -3.467518 | 3.736911  | 1.859325  |
| C | -3.977453 | 2.554549  | 1.330655  |
| O | -4.570239 | -0.342323 | 0.441512  |
| O | -2.340401 | -2.060429 | 1.360347  |
| O | -1.221108 | -0.365033 | 3.516246  |
| H | 1.184834  | -0.242404 | 3.143652  |
| H | 3.291234  | -0.278676 | 1.861275  |
| H | 3.252423  | -0.036014 | -0.604196 |
| H | 1.086067  | 0.242215  | -1.779935 |
| H | -1.021806 | 0.262561  | -0.504754 |
| H | -4.927901 | 2.525735  | 0.812961  |
| H | -4.030695 | 4.656027  | 1.750902  |
| H | -1.867772 | 4.685558  | 2.934466  |
| H | -0.539069 | 2.591444  | 3.188212  |
| H | -0.828915 | -1.247551 | 3.526932  |

<sup>1</sup>IN

|   |           |           |           |
|---|-----------|-----------|-----------|
| C | -0.085327 | 0.406407  | 0.093420  |
| C | -0.026738 | 0.054683  | 1.444862  |
| C | 1.187442  | -0.346763 | 1.994268  |
| C | 2.330955  | -0.398077 | 1.200706  |
| C | 2.267723  | -0.056770 | -0.144805 |
| C | 1.054843  | 0.346002  | -0.697408 |
| C | -1.291371 | 0.084260  | 2.301608  |
| C | -2.340843 | -0.869001 | 1.691452  |
| C | -3.419600 | -0.011662 | 0.976422  |
| C | -3.151905 | 1.368078  | 1.417761  |
| C | -2.000153 | 1.419597  | 2.205944  |
| C | -1.591201 | 2.618017  | 2.776320  |
| C | -2.357282 | 3.752948  | 2.539599  |
| C | -3.508440 | 3.703503  | 1.740064  |
| C | -3.917617 | 2.508705  | 1.172013  |
| O | -4.278441 | -0.441325 | 0.257096  |
| O | -2.364074 | -2.052741 | 1.843395  |
| O | -1.052677 | -0.252543 | 3.644298  |
| H | 1.243253  | -0.603549 | 3.044224  |
| H | 3.272605  | -0.706186 | 1.639390  |
| H | 3.157966  | -0.100322 | -0.760567 |
| H | 0.996750  | 0.617716  | -1.744501 |
| H | -1.019254 | 0.740361  | -0.347913 |
| H | -4.809188 | 2.443047  | 0.559503  |
| H | -4.080001 | 4.608082  | 1.572457  |
| H | -2.058832 | 4.698299  | 2.977434  |
| H | -0.698188 | 2.660520  | 3.388446  |
| H | -0.986750 | -1.214817 | 3.701816  |
